# Supplementary material
Source: PubMed Central journal article supplement (PMC1829280)

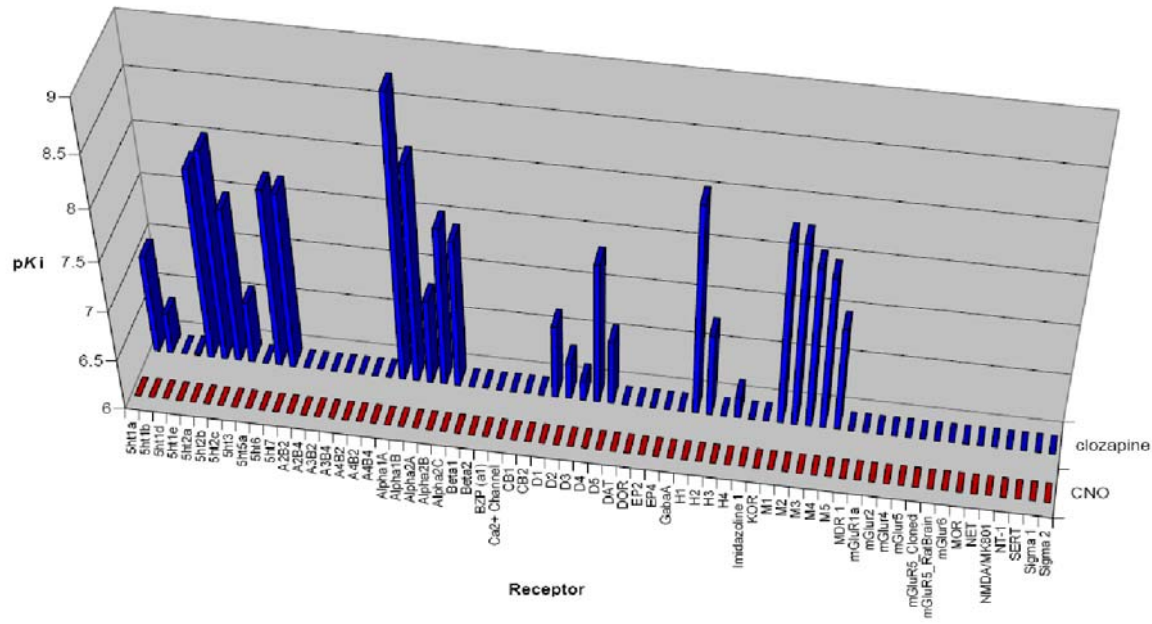

Supplement: pnas_0700293104_1.pdf [file pnas_0700293104_1.pdf]

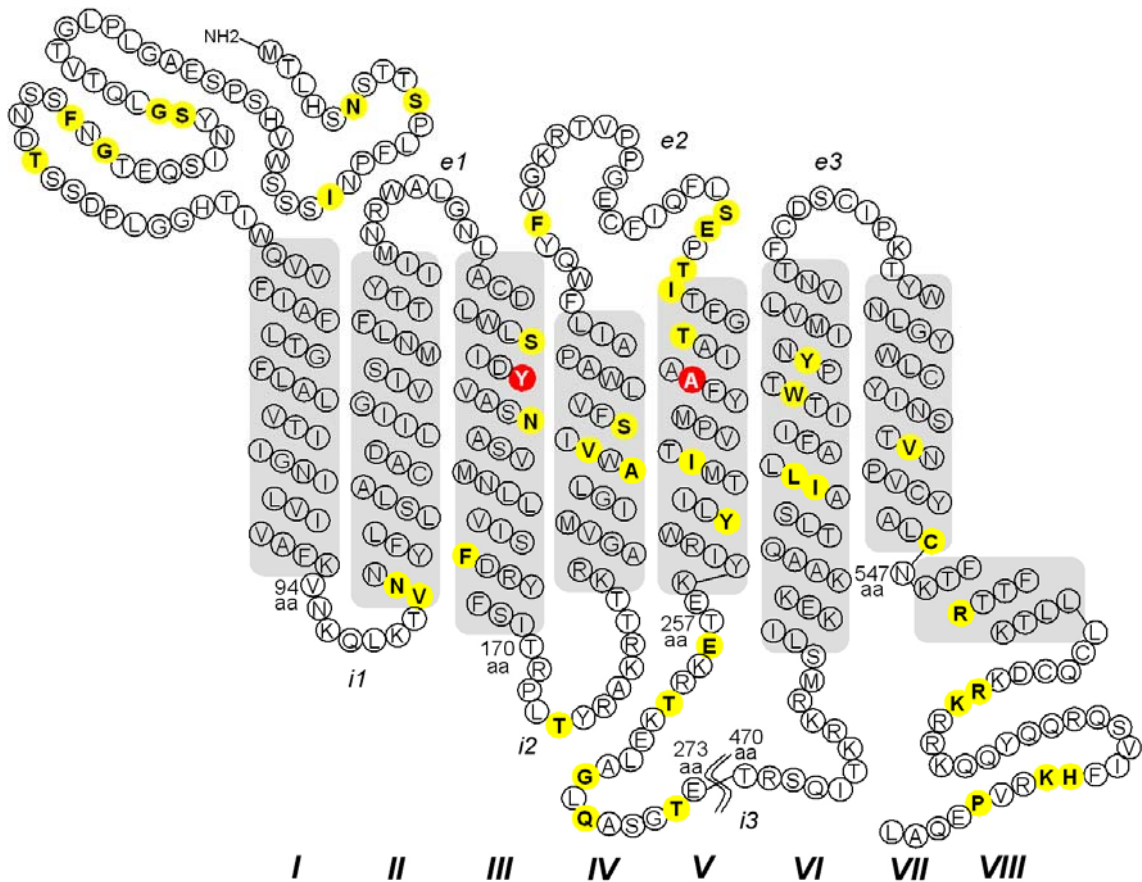

Supplement: pnas_0700293104_2.pdf [file pnas_0700293104_2.pdf]

Cell divisions  
(population doublings)

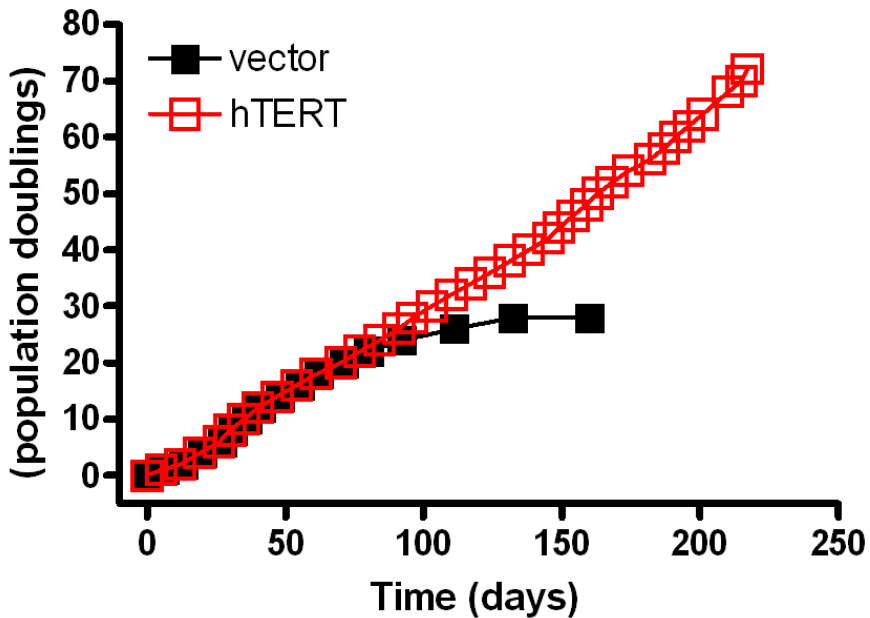

Supplement: pnas_0700293104_3.pdf [file pnas_0700293104_3.pdf]
